# Supplementary figures and images for: Novel redox-active vanadium( v )-dithiolene complexes for efficient supercapacitive energy storage: role of selenium functionalization on pseudocapacitive properties
Source: Royal Society of Chemistry journal article supplement (doi:10.1039/d5ta05686a), 2026-01-01

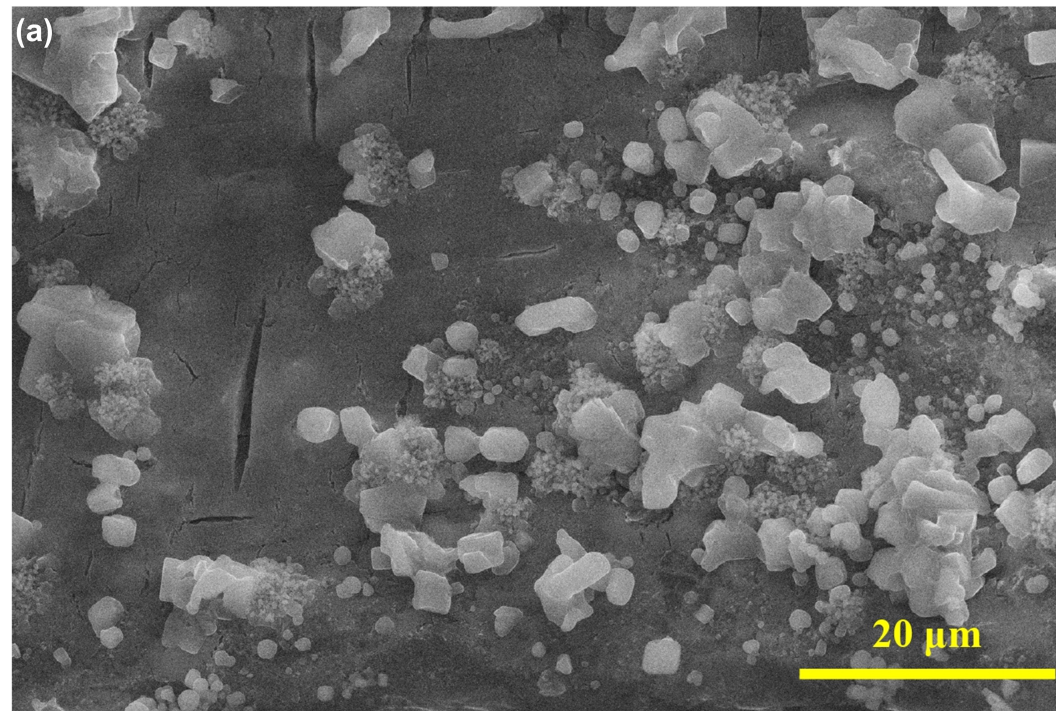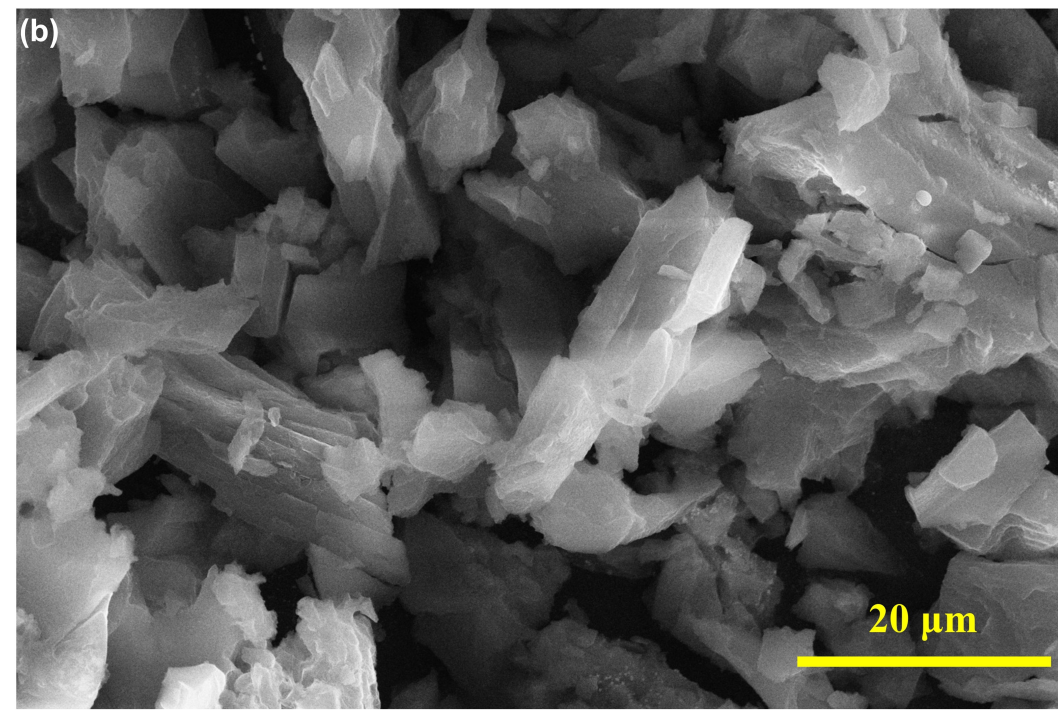

Supplement: d5ta05686a10.pdf [file d5ta05686a10.pdf]

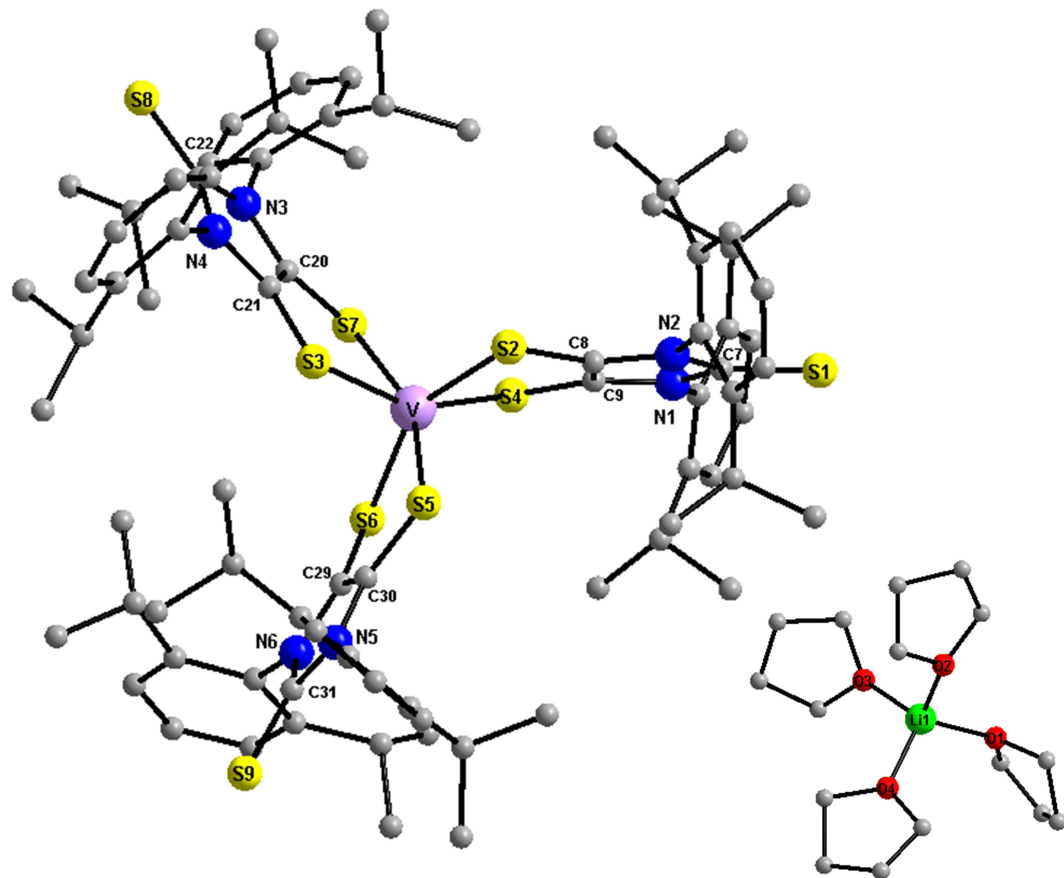

Supplement: d5ta05686a8.pdf [file d5ta05686a8.pdf]
